# Supplementary material
Source: publisher figshare collection journal article supplement (https://karger.figshare.com/ndownloader/files/6903914)
Supplement: Supplementary file 1 [file 6903914]

| Supplemental table 5 |
| --- |
| *Mann-Whitney-U-Test of HADS scores for comparisons between clinical subgroups depression and anxiety* |

| *Variable* | *mean rank*  *depression* | *mean rank*  *anxiety* | *z-value* | *p-value* |
| --- | --- | --- | --- | --- |
| **HADS Depression** | 65.74 | 41.53 | -2.73 | **< .01** |
| HADS Anxiety | 62.80 | 57.63 | -.58 | .56 |

*Notes.* N = 104 for depression subgroup, N = 19 for anxiety subgroup
